# Supplementary material
Source: PubMed Central journal article supplement (PMC4744156)
Supplement: NIHMS734791-supplement-01.pdf [file NIHMS734791-supplement-01.pdf]

**Supplemental Table 1. Semen parameters and cancer risk in men with SA versus fertile men**

|                                                                | <u>All-Site</u> |              | <u>Prostate</u> |              | <u>Melanoma</u> |              | <u>Testicular</u> |               | <u>Other</u> |              |
|----------------------------------------------------------------|-----------------|--------------|-----------------|--------------|-----------------|--------------|-------------------|---------------|--------------|--------------|
|                                                                | HR              | 95% CI       | HR              | 95% CI       | HR              | 95% CI       | HR                | 95% CI        | HR           | 95% CI       |
| <b>Model 1: Infertile vs. Fertile Controls</b>                 |                 |              |                 |              |                 |              |                   |               |              |              |
| Infertile                                                      | 1.17            | (0.96, 1.41) | 0.90            | (0.54, 1.52) | 1.35            | (0.9, 2.02)  | 3.30              | (1.59, 6.86)  | 0.99         | (0.76, 1.29) |
| <b>Model 2: Concentration vs. Fertile Controls</b>             |                 |              |                 |              |                 |              |                   |               |              |              |
| Azoospermia                                                    | 1.00            | (0.49, 2.06) | 0.37            | (0.04, 3.26) | 0.90            | (0.19, 4.25) | 3.67              | (0.45, 30.25) | 1.12         | (0.44, 2.85) |
| Oligozoospermic                                                | 1.66            | (1.13, 2.41) | 0.53            | (0.12, 2.26) | 1.12            | (0.44, 2.88) | 11.89             | (4.91, 28.82) | 1.36         | (0.79, 2.35) |
| Normozoospermic                                                | 1.08            | (0.84, 1.39) | 1.12            | (0.59, 2.12) | 0.96            | (0.55, 1.68) | 2.86              | (1.22, 6.71)  | 0.97         | (0.69, 1.36) |
| Hyperzoospermic                                                | 1.15            | (0.88, 1.50) | 0.87            | (0.39, 1.97) | 1.95            | (1.21, 3.16) | 1.60              | (0.57, 4.45)  | 0.90         | (0.62, 1.31) |
| <b>Model 3: Count vs. Fertile Controls</b>                     |                 |              |                 |              |                 |              |                   |               |              |              |
| Azoospermia                                                    | 1.01            | (0.49, 2.08) | 0.38            | (0.04, 3.32) | 0.92            | (0.19, 4.31) | 3.51              | (0.42, 29.3)  | 1.15         | (0.45, 2.92) |
| Oligozoospermic                                                | 1.78            | (1.23, 2.58) | 0.88            | (0.28, 2.77) | 1.29            | (0.54, 3.11) | 10.33             | (4.07, 26.23) | 1.59         | (0.95, 2.65) |
| Normozoospermic                                                | 1.09            | (0.79, 1.5)  | 1.12            | (0.52, 2.39) | 1.01            | (0.48, 2.1)  | 3.53              | (1.32, 9.41)  | 0.92         | (0.58, 1.44) |
| Hyperzoospermic                                                | 1.10            | (0.88, 1.50) | 0.87            | (0.43, 1.74) | 1.52            | (0.97, 2.38) | 2.17              | (0.94, 5.01)  | 0.91         | (0.66, 1.25) |
| <b>Model 4: Motility vs. Fertile Controls</b>                  |                 |              |                 |              |                 |              |                   |               |              |              |
| Azoospermia                                                    | 1.00            | (0.48, 2.05) | 0.38            | (0.04, 3.35) | 0.92            | (0.2, 4.32)  | 3.60              | (0.43, 29.81) | 1.12         | (0.44, 2.85) |
| Q1 (0-49)                                                      | 1.50            | (1.13, 1.99) | 1.37            | (0.69, 2.71) | 1.60            | (0.89, 2.89) | 4.12              | (1.53, 11.09) | 1.31         | (0.88, 1.94) |
| Q2 (50-59)                                                     | 1.31            | (0.98, 1.75) | 1.18            | (0.51, 2.73) | 1.24            | (0.66, 2.35) | 4.23              | (1.68, 10.64) | 1.14         | (0.76, 1.7)  |
| Q3 (60-69)                                                     | 0.86            | (0.61, 1.22) | 0.26            | (0.06, 1.1)  | 1.22            | (0.63, 2.34) | 2.19              | (0.74, 6.53)  | 0.79         | (0.49, 1.27) |
| Q4 (70-100)                                                    | 0.96            | (0.66, 1.4)  | 0.80            | (0.17, 3.86) | 1.43            | (0.72, 2.85) | 2.87              | (1.06, 7.79)  | 0.64         | (0.36, 1.14) |
| <b>Model 5: Vitality vs. Fertile Controls (UU Sample Only)</b> |                 |              |                 |              |                 |              |                   |               |              |              |
| Azoospermia                                                    | 1.28            | (0.6, 2.74)  | 0.50            | (0.05, 4.74) | 1.55            | (0.34, 7.1)  | 3.92              | (0.45, 33.88) | 1.28         | (0.46, 3.56) |
| Q1 (0-45)                                                      | 1.40            | (1.02, 1.92) | 1.25            | (0.6, 2.57)  | 1.26            | (0.63, 2.51) | 6.63              | (2.45, 17.94) | 1.13         | (0.71, 1.82) |
| Q2 (46-55)                                                     | 1.16            | (0.82, 1.64) | 1.58            | (0.7, 3.6)   | 0.98            | (0.45, 2.14) | 1.15              | (0.24, 5.56)  | 1.15         | (0.72, 1.83) |
| Q3 (56-64.4)                                                   | 0.94            | (0.65, 1.36) | 0.18            | (0.02, 1.36) | 0.72            | (0.3, 1.72)  | 2.75              | (0.93, 8.19)  | 1.04         | (0.65, 1.65) |
| Q4 (64.5-94)                                                   | 0.79            | (0.51, 1.22) | *               |              | 1.87            | (0.97, 3.61) | 0.61              | (0.07, 4.93)  | 0.55         | (0.28, 1.06) |

**Model 6: Head Morphology vs. Fertile Controls (UU Sample Only)**

|             |      |              |      |              |      |              |      |               |      |              |
|-------------|------|--------------|------|--------------|------|--------------|------|---------------|------|--------------|
| Azoospermia | 1.28 | (0.6, 2.73)  | 0.52 | (0.05, 4.95) | 1.51 | (0.33, 6.96) | 3.92 | (0.44, 34.99) | 1.26 | (0.45, 3.51) |
| Q1          | 1.09 | (0.75, 1.58) | 1.02 | (0.4, 2.58)  | 0.63 | (0.25, 1.63) | 4.22 | (1.43, 12.5)  | 1.07 | (0.65, 1.77) |
| Q2          | 1.06 | (0.75, 1.51) | 1.28 | (0.56, 2.95) | 1.07 | (0.51, 2.24) | 0.99 | (0.21, 4.77)  | 1.03 | (0.64, 1.64) |
| Q3          | 1.06 | (0.74, 1.51) | 0.95 | (0.38, 2.39) | 1.13 | (0.54, 2.38) | 1.96 | (0.51, 7.55)  | 1.00 | (0.62, 1.62) |
| Q4          | 0.96 | (0.65, 1.41) | 0.34 | (0.08, 1.48) | 1.83 | (0.97, 3.44) | 2.10 | (0.62, 7.14)  | 0.68 | (0.38, 1.23) |

**Model 7: Tail Morphology vs. Fertile Controls (UU Sample Only)**

|             |      |              |      |              |      |              |      |               |      |              |
|-------------|------|--------------|------|--------------|------|--------------|------|---------------|------|--------------|
| Azoospermia | 1.28 | (0.6, 2.74)  | 0.52 | (0.05, 5.01) | 1.53 | (0.33, 6.99) | 4.15 | (0.46, 37.03) | 1.26 | (0.45, 3.52) |
| Q1          | 1.21 | (0.86, 1.71) | 1.42 | (0.67, 2.99) | 1.18 | (0.56, 2.5)  | 2.86 | (0.83, 9.87)  | 1.03 | (0.62, 1.7)  |
| Q2          | 1.27 | (0.91, 1.77) | 1.26 | (0.53, 2.99) | 1.16 | (0.57, 2.36) | 5.31 | (1.91, 14.77) | 1.04 | (0.64, 1.67) |
| Q3          | 1.01 | (0.7, 1.46)  | 0.44 | (0.1, 1.95)  | 1.61 | (0.86, 3.04) | 0.48 | (0.06, 3.9)   | 0.96 | (0.58, 1.57) |
| Q4          | 0.66 | (0.42, 1.03) | 0.31 | (0.07, 1.35) | 0.57 | (0.2, 1.62)  | 1.12 | (0.23, 5.4)   | 0.77 | (0.44, 1.33) |

**Model 8: Total Motile Count vs. Fertile Controls (UU Sample Only)**

|             |      |              |      |              |      |              |      |               |      |              |
|-------------|------|--------------|------|--------------|------|--------------|------|---------------|------|--------------|
| Azoospermia | 1.29 | (0.6, 2.75)  | 0.52 | (0.05, 4.99) | 1.56 | (0.34, 7.17) | 3.65 | (0.42, 31.76) | 1.29 | (0.46, 3.59) |
| Q1          | 1.58 | (1.17, 2.13) | 1.16 | (0.54, 2.5)  | 0.99 | (0.47, 2.09) | 6.85 | (2.67, 17.59) | 1.56 | (1.03, 2.37) |
| Q2          | 0.69 | (0.46, 1.04) | 0.90 | (0.38, 2.15) | 0.59 | (0.23, 1.51) | 1.83 | (0.47, 7.07)  | 0.58 | (0.32, 1.05) |
| Q3          | 1.04 | (0.72, 1.51) | 0.86 | (0.25, 2.93) | 1.41 | (0.72, 2.75) | 1.60 | (0.42, 6.16)  | 0.88 | (0.52, 1.5)  |
| Q4          | 1.02 | (0.69, 1.51) | 0.45 | (0.1, 2.01)  | 1.97 | (1, 3.87)    | 0.55 | (0.07, 4.48)  | 0.90 | (0.53, 1.53) |
